# Supplementary material for: Health Insurance Coverage and Hypertension Control in China: Results from the China Health and Nutrition Survey
Source: PubMed Central journal article supplement (PMC4803201; doi:10.1371/journal.pone.0152091), 2016-03-22
Supplement: pone.0152091.s002.pdf [file pone.0152091.s002.pdf]

S1 Figure A: Trends in age-standardized prevalence of hypertension.

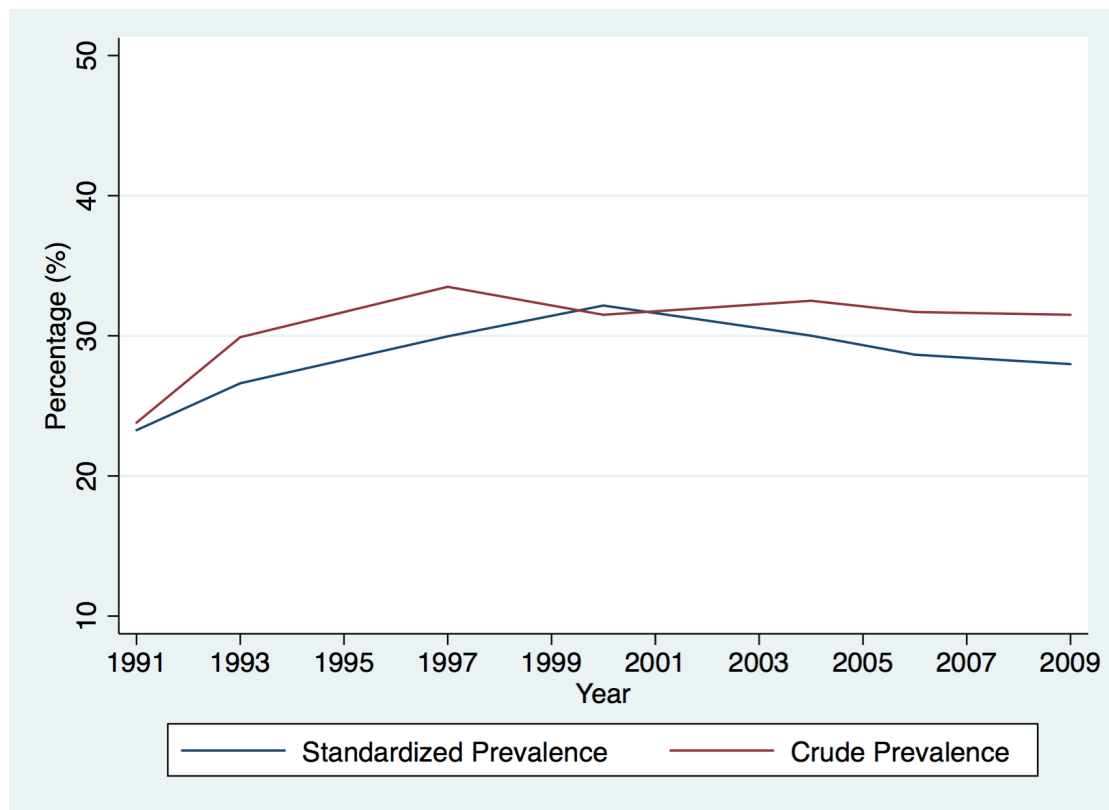

Figure A: Trends in age-standardized prevalence of hypertension.
