# Supplementary material for: Health Insurance Coverage and Hypertension Control in China: Results from the China Health and Nutrition Survey
Source: PubMed Central journal article supplement (PMC4803201; doi:10.1371/journal.pone.0152091), 2016-03-22
Supplement: pone.0152091.s003.pdf [file pone.0152091.s003.pdf]

S1 Table A and B: Age, gender and residency distribution over time.

| Wave  | 35-44 years |            | 45-54 years |            | 55-64 years |            | 65-74 years |            | ≥75 years |            |
|-------|-------------|------------|-------------|------------|-------------|------------|-------------|------------|-----------|------------|
|       | Frequency   | Proportion | Frequency   | Proportion | Frequency   | Proportion | Frequency   | Proportion | Frequency | Proportion |
| 1991  | 1535        | 33.9       | 1146        | 25.3       | 1078        | 23.8       | 540         | 11.9       | 233       | 5.1        |
| 1993  | 136         | 32.9       | 88          | 21.3       | 94          | 22.7       | 65          | 15.7       | 31        | 7.5        |
| 1997  | 606         | 35.5       | 459         | 26.9       | 356         | 20.9       | 197         | 11.6       | 87        | 5.1        |
| 2000  | 247         | 33.5       | 214         | 29.0       | 157         | 21.3       | 86          | 11.7       | 34        | 4.6        |
| 2004  | 353         | 34.3       | 270         | 26.2       | 188         | 18.3       | 145         | 14.1       | 73        | 7.1        |
| 2006  | 191         | 40.2       | 94          | 19.8       | 86          | 18.1       | 75          | 15.8       | 29        | 6.1        |
| 2009  | 397         | 36.8       | 301         | 27.9       | 205         | 19.0       | 113         | 10.5       | 62        | 5.8        |
| Total | 3465        | 34.8       | 2572        | 25.8       | 2164        | 21.7       | 1221        | 12.3       | 549       | 5.5        |

Table A. Age distribution over time.

|                  | 1991                     | 1993          | 1997          | 2000          | 2004          | 2006          | 2009          |
|------------------|--------------------------|---------------|---------------|---------------|---------------|---------------|---------------|
|                  | Frequency (Proportion %) | Frequency (%) | Frequency (%) | Frequency (%) | Frequency (%) | Frequency (%) | Frequency (%) |
| <b>Gender</b>    |                          |               |               |               |               |               |               |
| Male             | 2130 (47.0)              | 242 (58.5)    | 871 (51.1)    | 355 (48.1)    | 483 (46.9)    | 231 (48.6)    | 514 (47.7)    |
| Female           | 2402 (53.0)              | 172 (41.6)    | 834 (48.9)    | 383 (51.9)    | 546 (53.1)    | 244 (51.4)    | 564 (52.3)    |
| <b>Residency</b> |                          |               |               |               |               |               |               |
| Urban            | 1319 (29.1)              | 115 (27.8)    | 886 (52.0)    | 359 (48.6)    | 501 (48.7)    | 212 (44.6)    | 539 (50.0)    |
| Rural            | 3213 (70.9)              | 299 (72.2)    | 819 (48.0)    | 379 (51.4)    | 528 (51.3)    | 263 (55.4)    | 539 (50.0)    |

Table B. Gender and residency distribution by wave
